# Supplementary material for: Feeding strategies differentiate four detritivorous curimatids in the Amazon
Source: Copernicus journal article supplement (doi:10.5194/we-20-133-2020), 2020-10-02
Supplement: Supplementary file 1 [file we-20-133-2020-supplement.pdf]

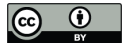

*Supplement of*

## **Feeding strategies differentiate four detritivorous curimatids in the Amazon**

**Thatyla Farago et al.**

*Correspondence to:* Thatyla Farago ([farago.thatyla@gmail.com](mailto:farago.thatyla@gmail.com))

The copyright of individual parts of the supplement might differ from the CC BY 4.0 License.

## Tables

**Table S1.** Alimentary Index (IA<sub>i</sub>) (%) of four species of Curimatidae. Detritus = degraded organic matter; Vegetal = fragments of plant material; Microcrustaceans = ostracods and snails; Microalgae = chlorophytes and cyanophytes; Zooplankton = cladocerans and copepods.

|                        | Alimentary Index - IA <sub>i</sub> (%) |         |                  |            |               |             |
|------------------------|----------------------------------------|---------|------------------|------------|---------------|-------------|
|                        | Detritus                               | Vegetal | Microcrustaceans | Microalgae | Thecamoebians | Zooplankton |
| <i>P. latior</i>       | 99.87                                  |         |                  |            |               | 0.13        |
| <i>P. altamazonica</i> | 99.97                                  |         |                  | 0.03       |               |             |
| <i>P. rutiloides</i>   | 99.45                                  | 0.002   | 0.051            | 0.006      | 0.001         | 0.49        |
| <i>P. amazonica</i>    | 100                                    |         |                  |            |               |             |

**Table S2.** Percentage variation explained by the canonical axes (CVA) and the loadings for the size-corrected morphological traits. Explained proportion and significance values of each variable were tested on the first two CA axes using the *envfit* parametric test. Bold values indicate the more weighed variables in the first axis.

| Trait                         | CA1          | CA2   | r <sup>2</sup> | P     |
|-------------------------------|--------------|-------|----------------|-------|
| Intestine Weigth (IW)         | 0.18         | -0.98 | 0.88           | 0.001 |
| Intestine Length (IL)         | <b>0.83</b>  | -0.56 | 0.87           | 0.001 |
| Total Length (TL)             | <b>-0.75</b> | 0.67  | 0.10           | 0.001 |
| Total Weight (TW)             | <b>0.95</b>  | 0.32  | 0.57           | 0.001 |
| Somatic Digestive Index (DSI) | -0.13        | -0.99 | 0.98           | 0.001 |
| Explained variation (%)       | 88.9         | 7.4   |                |       |

## **Figures**

### ***Potamorhina latior***

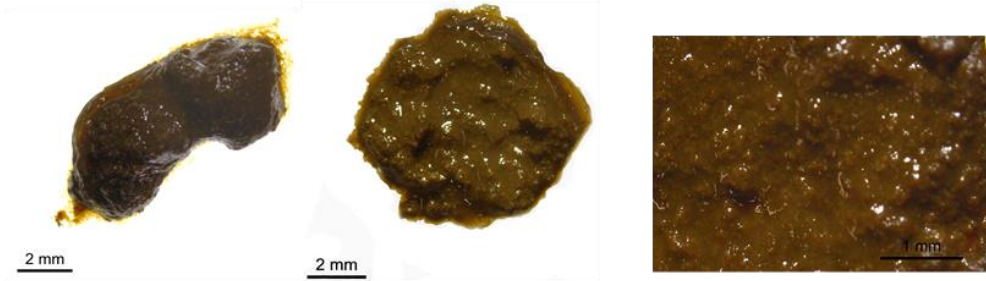

### ***Potamorhina altamazonica***

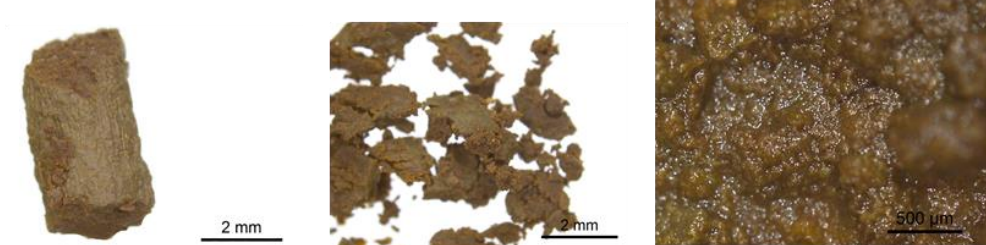

### ***Psectrogaster rutiloides***

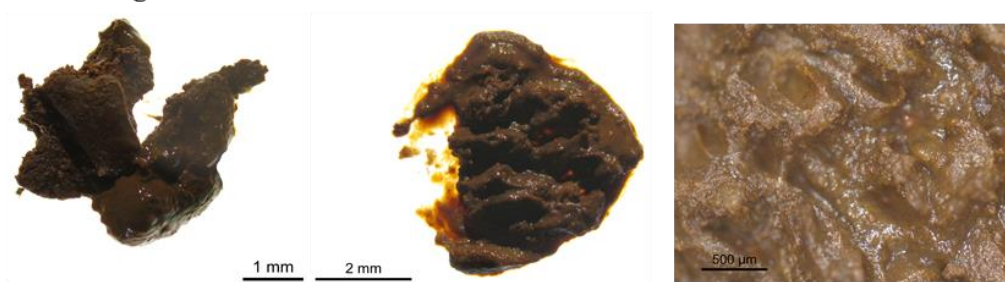

### ***Psectrogaster amazonica***

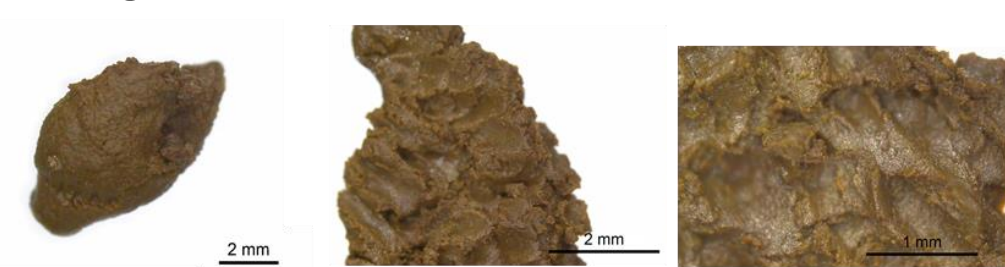

**Figure S1.** Stomach content of *Potamorhina latior*, *Potamorhina altamazonica*, *Psectrogaster rutiloides* and *Psectrogaster amazonica*. Images made with stereomicroscope Leica S9i.

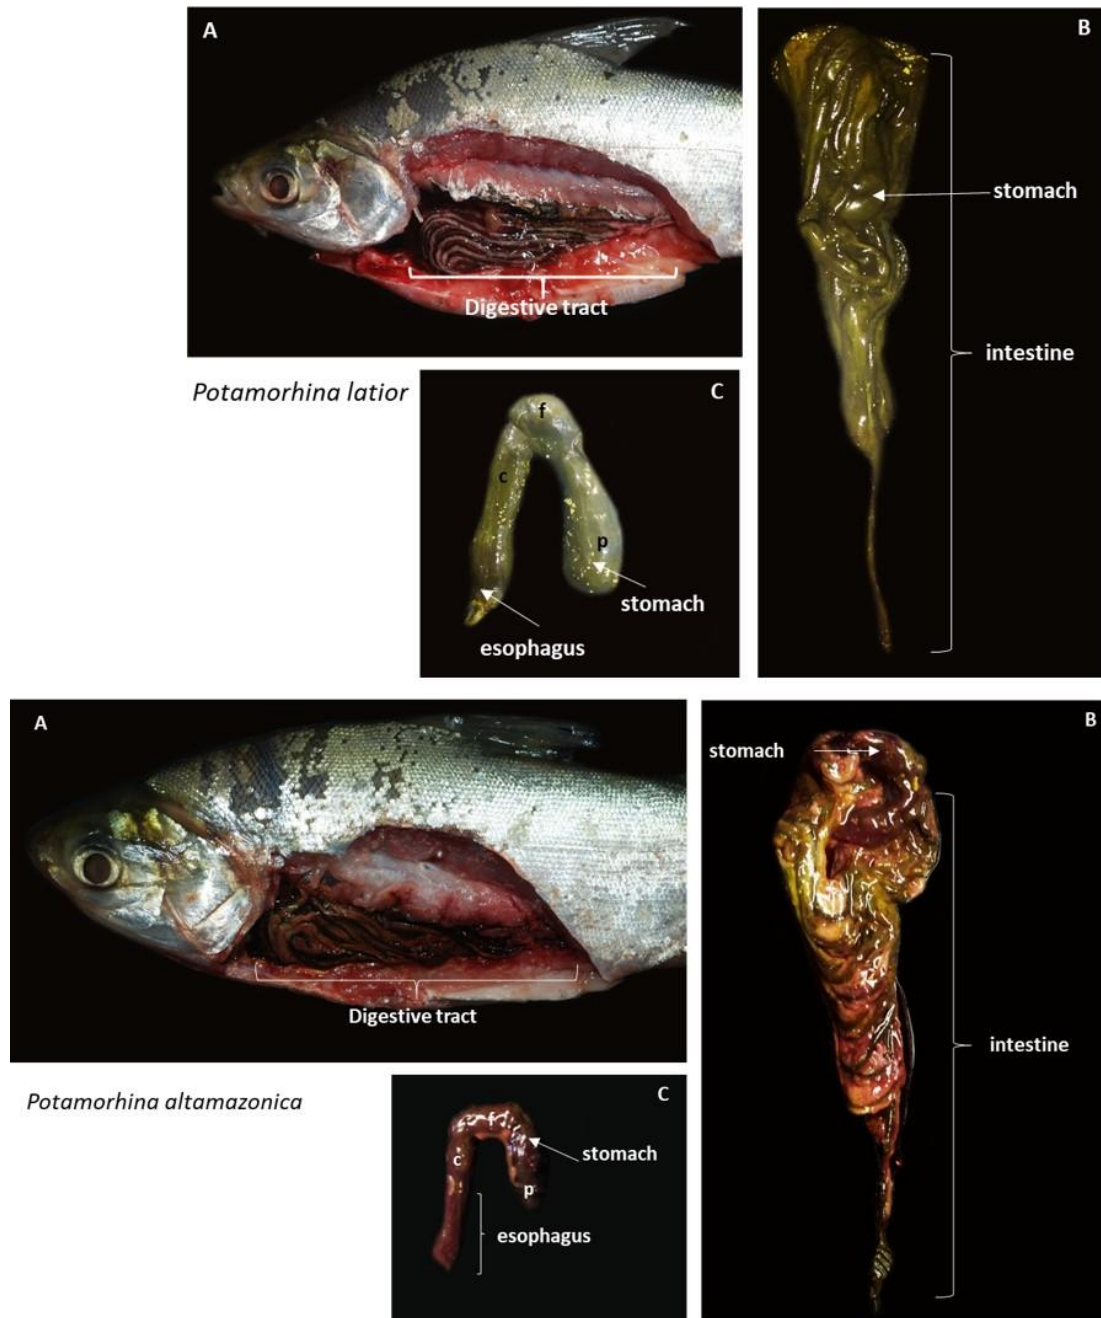

**Figure S2.** Images of the digestive tract of *Potamorphina latior* (81mm) and *Potamorphina altamazonica* (175mm). **A:** General view of the celom cavity indicating the position of the digestive tract. **B:** Digestive tract indicating stomach and long coiled intestine. **C:** Small, elongated stomach, of the fundic type with pyloric (p), fundic (f) and cardiac (c) regions, and esophagus.

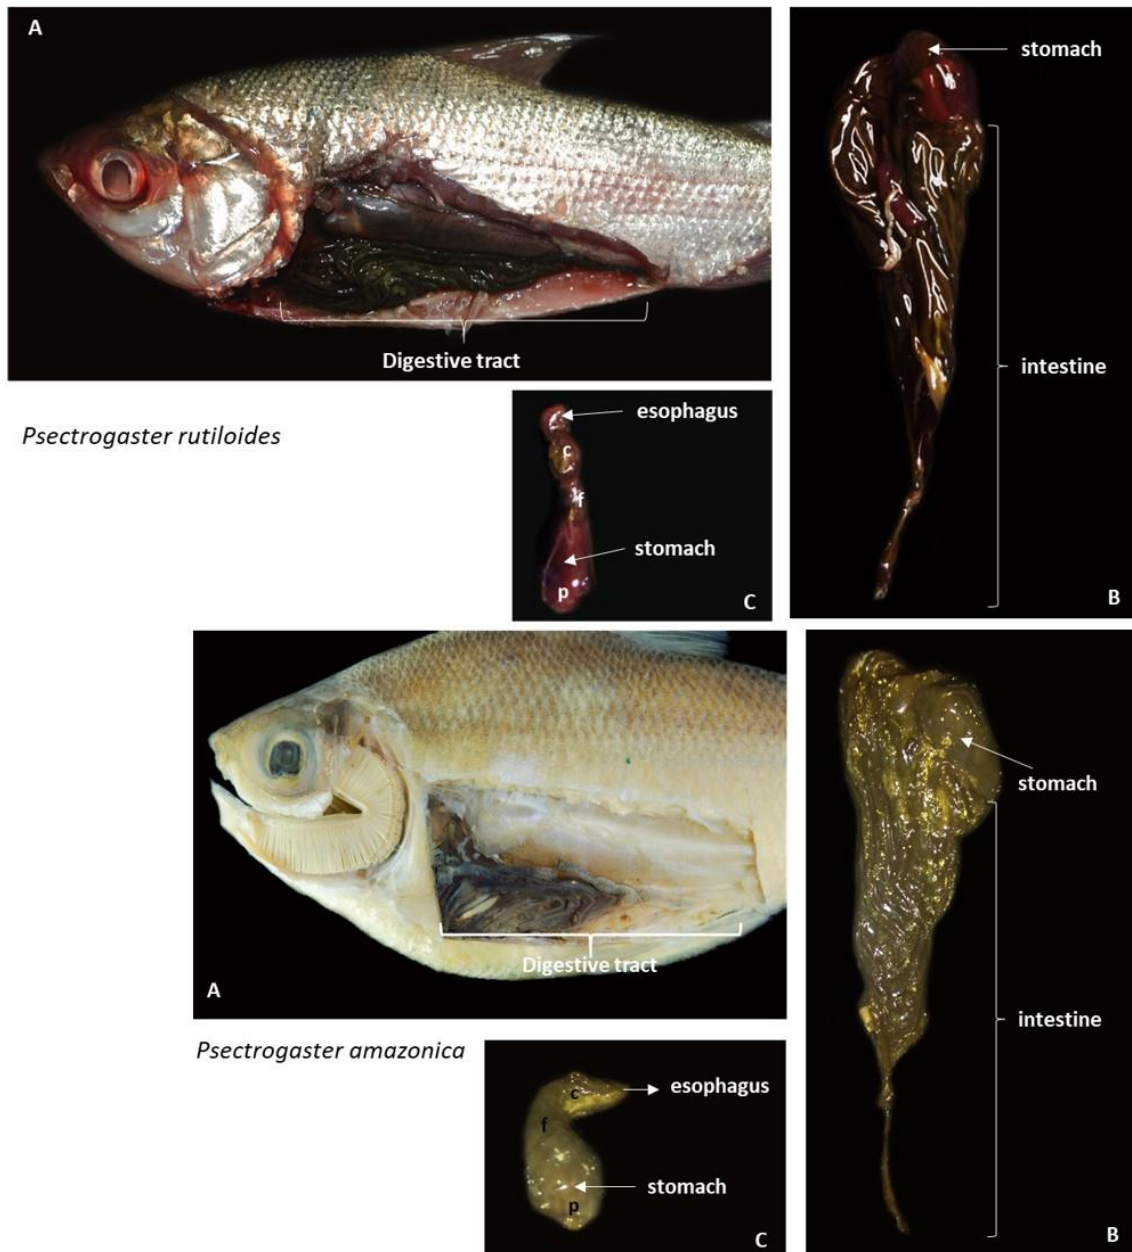

**Figure S3.** Images of the digestive tract of *Psectrogaster rutiloides* (129 mm) and *Psectrogaster amazonica* (143 mm). **A:** General view of the celom cavity indicating the position of the digestive tract. **B:** Digestive tract indicating stomach and long coiled intestine. **C:** Small, rounded stomach, of the fundic type with pyloric (p), fundic (f) and cardiac (c) regions and esophagus.
